# Supplementary material for: A New Risk Score System for Early Warning Gastrointestinal Graft-Versus-Host Disease Based on the Immune Function of Mucosal-Associated Invariant T Cells
Source: Research Square preprint supplement (doi:10.21203/rs.3.rs-7108503/v1), 2025-07-31
Supplement: Supplementary file 1 [file e58972505a70714a1abf93df.docx]

**Supplementary Table**

**Table S1. Donors and patients’ characteristics**

| **Characteristics** | **No. of patients** |
| --- | --- |
| **Number** | 149 |
| **Donor** |  |
| **Median age, years** | 39 (10-62) |
| **Sex, male (n, %)** | 79 (26.2%) |
| **Recipient** |  |
| **Median age, years** | 39 (14-69) |
| **Sex, male (n, %)** | 87 (58.4%) |
| **Diagnosis (n, %)** |  |
| Acute myeloid leukemia | 60 (40.3%) |
| Acute lymphoblastic leukemia  Myelodysplastic syndrome  Mixed lineage acute leukemia  Non-Hodgkinlymphoma  Others  **ABO-matched grafts (n, %)** | 48 (32.2%)  20 (13.4%)  3 (2.0%)  7 (4.7%)  11 (7.4%) |
| Matched  Major mismatch  Minor mismatch  Bi-directional mismatch  **Donor-recipient sex-matched (n, %)**  Male-male  Male-female  Female-male  Female-female  **Conditioning regimen (n, %)**  Bu/Cy+ATG  Bu/Cy  Bu/Cy+Flu+ATG  TBI/Cy+ATG  Others  **Transplant types**  Haploidentical  Sibling-identical | 81 (54.4%)  18 (12.1%)  43 (28.8%)  7 (4.7%)  43 (28.9%)  36 (24.2%)  26 (17.4%)  44 (29.5%)  84 (56.4%)  17 (11.4%)  30 (20.1%)  8 (5.4%)  10 (6.7%)  111 (74.5%)  38 (25.5%) |
| **Infused Median MNC (range, 108/Kg)** | 9.3(4.96-18.037) |
| **Infused Median CD34+ cells (range, 106/Kg)** | 3.37(0.68-11.92) |

**Table S2. Univariate analyses of risk factors for GI-aGVHD.**

| **Factors** | **Univariate** | | |
| --- | --- | --- | --- |
| **HR** | **95%CI** | **P** |
| **Clinical covariates** |  |  |  |
| Recipient sex | 1.21 | 0.55-2.7 | 0.64 |
| Recipient age | 0.97 | 0.94-1.0 | **0.023** |
| Donor sex | 0.78 | 0.35-1.75 | 0.55 |
| Donor age | 1.02 | 0.99-1.06 | 0.18 |
| ABO-matched grafts (Mismatch vs. Match) | 1.23 | 0.56-2.72 | 0.60 |
| Donor-recipient sex-matched (Mismatch vs. Match) | 1.02 | 0.46-2.26 | 0.96 |
| Conditioning regimen (BU-CY+ATG vs. Others) | 0.76 | 0.34-1.73 | 0.52 |
| Transplant types (Sibling vs. Haplo) | 0.24 | 0.06-1.02 | **0.053** |
| **Infection within +100 days** |  |  |  |
| Pneumonia | 0.74 | 0.26-2.15 | 0.59 |
| BSI | 1.93 | 0.70-5.33 | 0.20 |
| CMV | 1.60 | 0.41-6.26 | 0.50 |
| EBV | 2.77 | 1.20-6.39 | **0.017** |
| HHV6 | 1.43 | 0.36-5.77 | 0.61 |
| Other viruses | 1.73 | 0.64-4.63 | 0.28 |
| **G-PBSC variables** |  |  |  |
| Infused MNC | 0.96 | 0.78-1.18 | 0.69 |
| Infused CD34+ cells | 0.90 | 0.72-1.12 | 0.34 |
| CD3+T cells (%lymphocytes) | 1.04 | 0.98-1.09 | 0.21 |
| CD4+T cells (%CD3+T cells) | 1.01 | 0.96-1.05 | 0.79 |
| CD8+T cells (%CD3+T cells) | 0.99 | 0.96-1.04 | 0.70 |
| Treg cells (%CD3+T cells) | 1.18 | 0.91-1.53 | 0.22 |
| γδT cells (%CD3+T cells) | 0.99 | 0.90-1.08 | 0.78 |
| Conventional T cells (%CD3+T cells) | 1.01 | 0.96-1.06 | 0.79 |
| MAIT cells (%CD3+T cells) | 0.74 | 0.58-0.95 | **0.019** |
| **MAIT cell markers in G-PBSCs (%CD3+T cells)** |  |  |  |
| CCR1+MAIT cells | 0.64 | 0.44-0.93 | **0.02** |
| CCR2+MAIT cells | 0.45 | 0.32-0.63 | **＜0.001** |
| CXCR3+MAIT cells | 0.61 | 0.38-0.97 | **0.037** |
| CXCR4+MAIT cells | 0.42 | 0.23-0.77 | **0.0052** |
| CCR5+MAIT cells | 0.72 | 0.49-1.05 | 0.085 |
| CCR6+MAIT cells | 0.54 | 0.26-1.11 | 0.095 |
| CXCR6+MAIT cells | 0.33 | 0.21-0.54 | **＜0.001** |
| CCR7+MAIT cells | 0.37 | 0.21-0.64 | **＜0.001** |
| CD69+MAIT cells | 0.38 | 0.18-0.79 | **0.0098** |
| CD114+MAIT cells | 0.48 | 0.33-0.68 | **＜0.001** |
| IFN-γ+MAIT cells | 0.55 | 0.39-0.77 | **＜0.001** |
| IL-4+MAIT cells | 0.46 | 0.30-0.71 | **＜0.001** |
| IL-17A+MAIT cells | 0.49 | 0.33-0.71 | **＜0.001** |

**Table S3. VIF Assessment of GI aGVHD Predictors.**

| **Variables** | **VIF** |
| --- | --- |
| MAIT cells (%CD3+T cells) | 3.14 |
| CCR1+MAIT cells | 4.65 |
| CCR2+MAIT cells | 2.52 |
| CXCR3+MAIT cells | 3.42 |
| CXCR4+MAIT cells | 4.69 |
| CXCR6+MAIT cells | 6.89 |
| CCR7+MAIT cells | 3.09 |
| CD69+MAIT cells | 4.70 |
| CD114+MAIT cells | 2.05 |
| IFN-γ+MAIT cells | 3.51 |
| IL-4+MAIT cells | 2.05 |
| IL-17A+MAIT cells | 2.53 |

**Table S4. Spectral flow cytometry detection markers.**

| **Markers(antibodies)** | **Channel** | **Company** | **Clone** | **Functions** |
| --- | --- | --- | --- | --- |
| CD3 | PE-Cy7 | Biolegend | UCHT1 | T cell subsets |
| CD4 | BV750 | Biolegend | SK3 |
| CD8A | BV570 | Biolegend | RPA-T8 |
| CD161 | APC | Biolegend | HP-3G10 |
| TCRVα7.2 | PE | Biolegend | 3C10 |
| CD127 | BV510 | Biolegend | A019D5 |
| CD25 | BV605 | BD | 2A3 |
| TCRγ/δ | APC | Biolegend | B1 |
| RORγt | PE-CF594 | BD | Q21-559 | Tissue repair |
| IL-17A | BV785 | BD | N49-653 |
| T-BET | AF488 | Biolegend | 4B10 | Cytotoxicity |
| IFN-γ | BV650 | Biolegend | 4S.B3 |
| GATA3 | BV421 | BD | L50-823 | Immunosuppression |
| IL-4 | BV510 | Biolegend | MP4-25D2 |
| CD69 | AF647 | Biolegend | FN50 | Activation/tissue residency |
| CD114 | BV480 | Biolegend | [LMM741](https://www.biolegend.com/en-us/search-results?Clone=LMM741) | Immunoregulation |
| CCR1 | PERCP-CY5.5 | Biolegend | 5F10B29 | Chemokine receptors |
| CCR2 | AF405 | R&D | FAB150V |
| CXCR3 | BV605 | Biolegend | G025H7 |
| CCR5 | BB515 | BD | 3A9 |
| CCR6 | AF700 | Biolegend | G034E3 |
| CXCR6 | BV711 | BD | 13B 1E5 |
| CXCR4 | APC-Cy7 | Biolegend | 12G5 |
| CCR7 | PE-Cy5 | Biolegend | G043H7 |
